# Supplementary material for: Cristianismo y mitos clásicos en el arte moderno. J.M. Blázquez Martínez- Ediciones Cátedra, Madrid , 2009
Source: Royal Society of Chemistry journal article supplement (doi:10.1039/d1cp00842k), 2010-01-01
Supplement: d1cp00842k1.pdf [file d1cp00842k1.pdf]

## Supporting Information for

### **Non-invasively improving the Schottky barrier of MoS<sub>2</sub>/metal contacts by inserting SiC layer**

Qinglong Fang,<sup>a, b</sup> Xumei Zhao,<sup>a</sup> Lin Yuan,<sup>a</sup> Boyu Wang,<sup>a</sup> Caijuan Xia,<sup>a, \*</sup> Fei Ma<sup>b, \*</sup>

*<sup>a</sup> School of Science, Xi'an Polytechnic University, Xi'an, 710048, Shaanxi, China*

*<sup>b</sup> State Key Laboratory for Mechanical Behavior of Materials, Xi'an Jiaotong University, Xi'an  
710049, Shaanxi, China*

\* Corresponding authors.

E-mail addresses: mafei@mail.xjtu.edu.cn (Fei Ma); caijuanxia@xpu.edu.cn (Caijuan Xia).

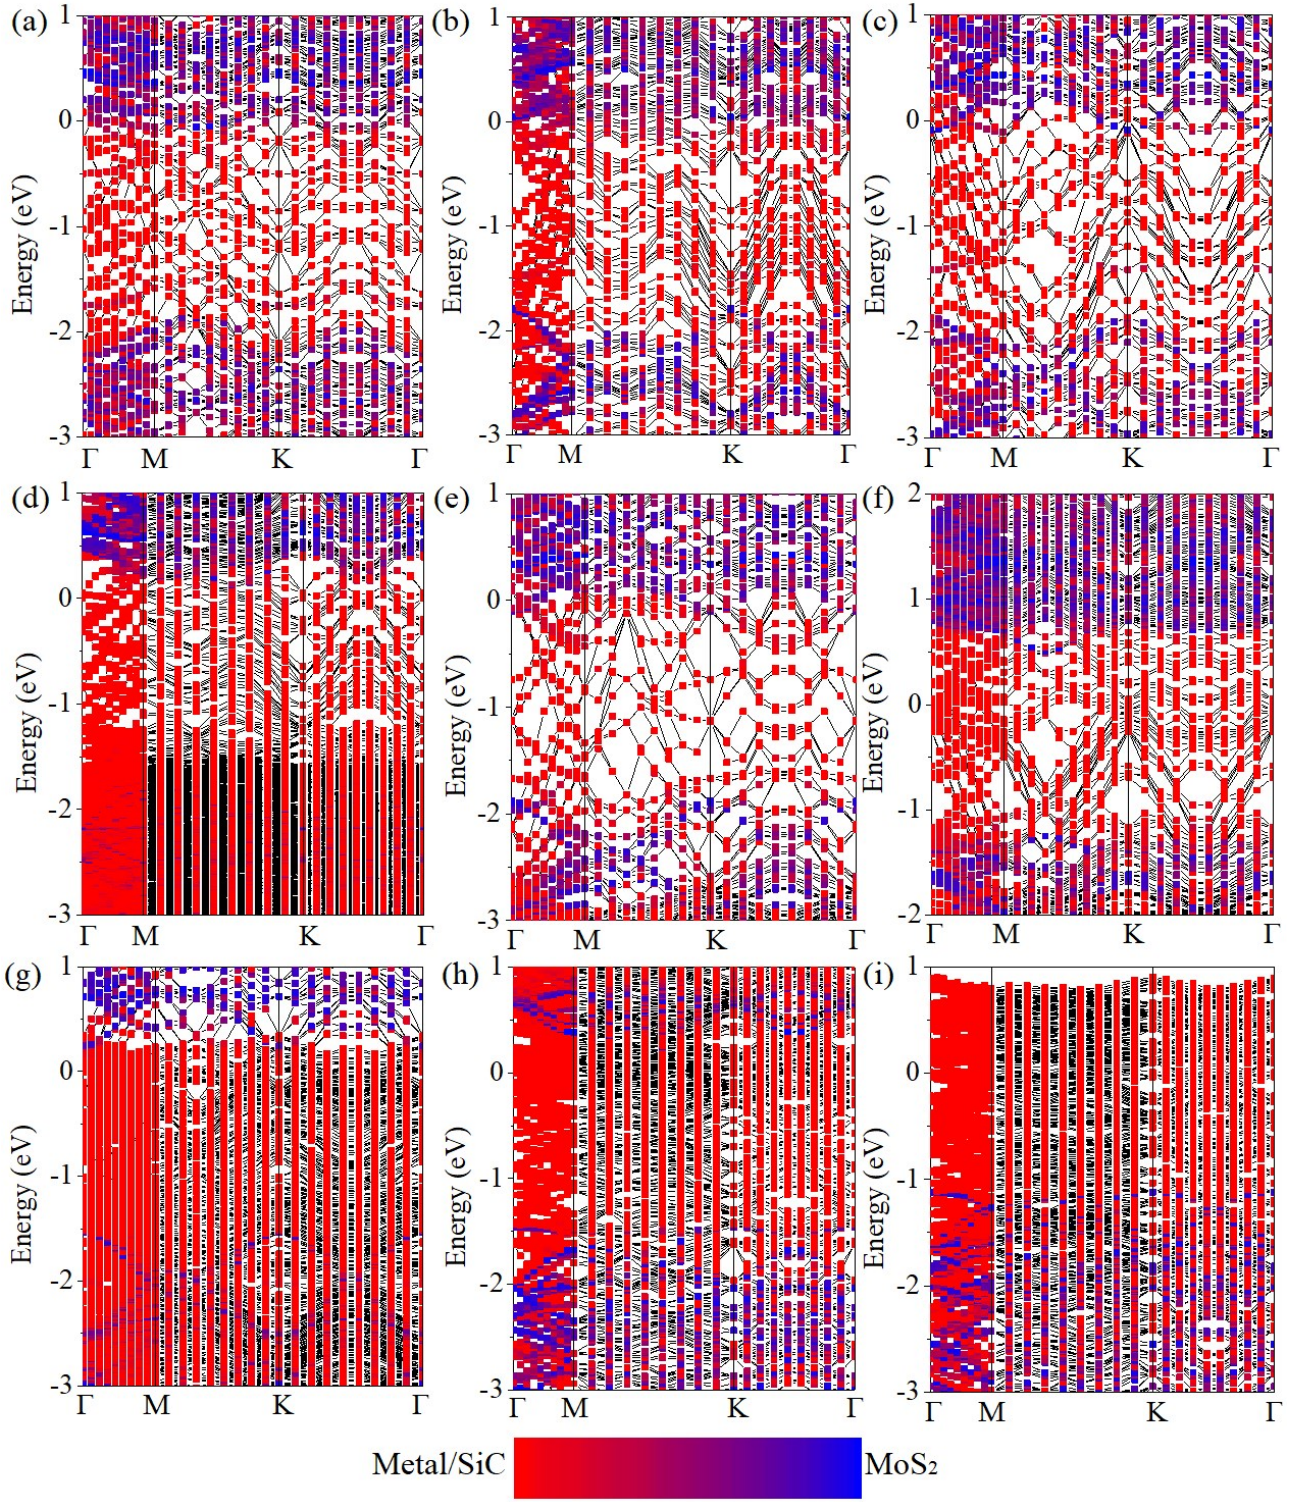

**Figure S1.** Band structures of the MoS<sub>2</sub>/metals by inserting SiC layer: (a) Mg, (b) Al, (c) In, (d) Cu, (e) Ag, (f) Au, (g) Pd, (h) Sc, and (i) Ti.

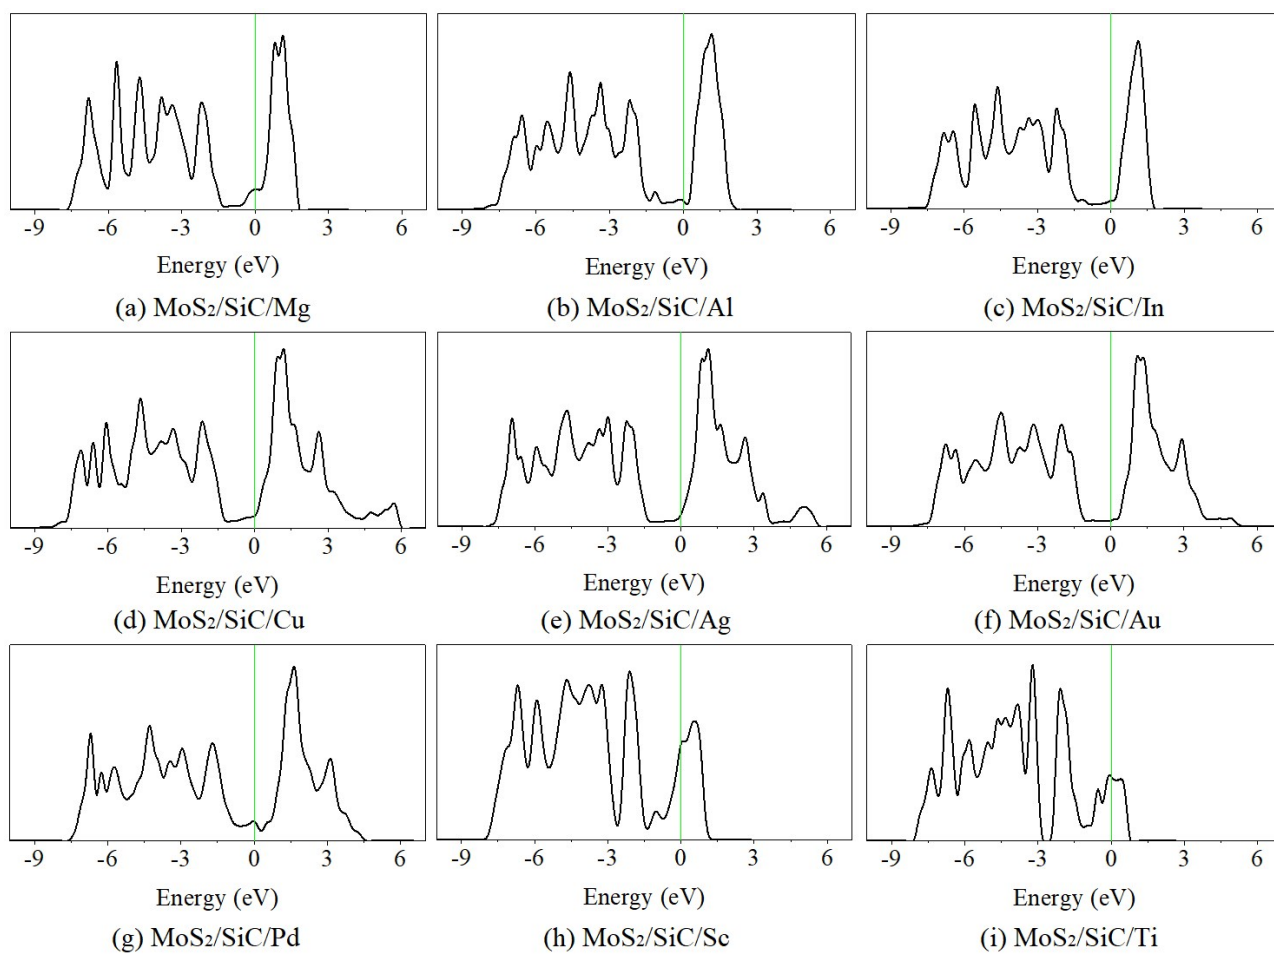

**Figure S2.** Partial density of states (PDOS) of monolayer MoS<sub>2</sub> in MoS<sub>2</sub>/metals by inserting SiC layer.

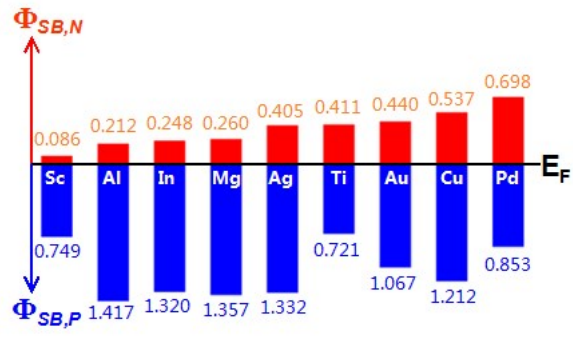

**Fig. S3.** Schottky barrier height ( $\Phi_{SB}$ ) of MoS<sub>2</sub>/metals.
